# Supplementary material
Source: PubMed Central journal article supplement (PMC4270390)
Supplement: es5026118_si_001.pdf [file es5026118_si_001.pdf]

# **Temporal variability of PBDE serum concentrations over one year**

**Colleen M. Makey<sup>1\*</sup>, Michael D. McClean<sup>1</sup>, Andreas Sjödin<sup>2</sup>, Janice Weinberg<sup>3</sup>,  
Courtney C Carignan<sup>1,4§</sup>, Thomas F Webster<sup>1</sup>**

<sup>1</sup>Boston University School of Public Health, Department of Environmental Health, 715 Albany Street, Boston, MA, USA; <sup>2</sup>Centers for Disease Control and Prevention, 1600 Clifton Road, Atlanta, GA, USA; <sup>3</sup>Boston University School of Public Health, Department of Biostatistics, 1010 Massachusetts Ave, Boston, MA, USA. <sup>4</sup>Dartmouth College, Department of Biological Sciences 79 College Street, Hanover, NH, USA.

Supporting information includes seven pages (S-1 to S-7) with three supplemental tables (T1, T2, and T3) and three supplemental figures (F1, F2, F3).

Supplemental Table 1. Polybrominated diphenyl ethers measured from 2010-11 in 52 participants over three sampling rounds. Total number of valid measurements above the limit of detection (LOD) and range of measurements.

| Analyte                                          | Abv.    | Subjects | Serum Samples | LOD ng/g lipid | % Detect | Range        |
|--------------------------------------------------|---------|----------|---------------|----------------|----------|--------------|
| <b>Polybrominated Diphenyl Ethers (PBDEs)</b>    |         |          |               |                |          |              |
| 2,2',4-tribromodiphenyl ether                    | BDE-17  | 52       | 142           | 0.2 - 0.8      | 1        | <LOD - 0.8   |
| 2,4,4'-tribromodiphenyl ether                    | BDE-28  | 52       | 142           | 0.2 - 0.8      | 68       | <LOD - 5.1   |
| 2,2',4,4'-hexabromodiphenyl ether                | BDE-47  | 52       | 142           | 0.2 - 0.8      | 100      | 0.6 - 151    |
| 2,3',4,4'-tetrabromodiphenyl ether               | BDE-66  | 52       | 142           | 0.2 - 0.8      | 1        | <LOD - 0.7   |
| 2,2',3,4,4'-pentabromodiphenyl ether             | BDE-85  | 52       | 142           | 0.2 - 0.8      | 22       | <LOD - 4.0   |
| 2,2',4,4,5-pentabromodiphenyl ether              | BDE-99  | 52       | 142           | 0.2 - 0.8      | 92       | < LOD - 43.5 |
| 2,2',4,4',6-pentabromodiphenyl ether             | BDE-100 | 52       | 142           | 0.2 - 0.8      | 89       | < LOD - 44.1 |
| 2,2',4,4',5,5'-hexabromodiphenyl ether           | BDE-153 | 52       | 142           | 0.2 - 0.8      | 100      | 0.06 - 96.7  |
| 2,2',4,4',5,6'-hexabromodiphenyl ether           | BDE-154 | 52       | 142           | 0.2 - 0.8      | 19       | < LOD - 4.5  |
| 2,2',3,4,4',5',6'-heptabromodiphenyl ether       | BDE-183 | 52       | 142           | 0.2 - 0.8      | 12       | < LOD - 3.3  |
| 2,2',3,3',4,4',5,5',6,6'-decabromodiphenyl ether | BDE-209 | 52       | 142           | 2.3 - 7.9      | 16       | < LOD - 18.3 |

Supplemental Table 2. Estimated ICCs and variance components for selected PBDEs (participants=52, serum samples=142).

| Parameters                                    | ∑PBDE                | BDE - 28            | BDE - 47             | BDE - 99             | BDE - 100            | BDE - 153            |
|-----------------------------------------------|----------------------|---------------------|----------------------|----------------------|----------------------|----------------------|
|                                               | Estimate (95% CI)    | Estimate (95% CI)   | Estimate (95% CI)    | Estimate (95% CI)    | Estimate (95% CI)    | Estimate (95% CI)    |
| ICC <sub>NULL</sub> <sup>A</sup>              | 0.96                 | 0.90                | 0.96                 | 0.91                 | 0.92                 | 0.98                 |
| σ <sup>2</sup> <sub>WNull</sub> <sup>A</sup>  | 0.033 (0.03 to 0.05) | 0.076 (0.06 to 0.1) | 0.037 (0.03 to 0.05) | 0.10 (0.08 to 0.15)  | 0.12 (0.09 to 0.14)  | 0.030 (0.02 to 0.04) |
| σ <sup>2</sup> <sub>BNull</sub> <sup>A</sup>  | 0.86 (0.5 to 1)      | 0.66 (0.4 to 0.9)   | 1.0 (0.6 to 1.4)     | 1.0 (0.6 to 1.4)     | 1.4 (0.8 to 2)       | 1.2 (0.7 to 1.7)     |
| ICC <sub>LIPID</sub> <sup>B</sup>             | 0.97                 | 0.89                | 0.97                 | 0.91                 | 0.93                 | 0.99                 |
| σ <sup>2</sup> <sub>WLipid</sub> <sup>B</sup> | 0.025 (0.02 to 0.03) | 0.069 (0.05 to 0.1) | 0.030 (0.02 to 0.04) | 0.096 (0.07 to 0.13) | 0.10 (0.08 to 0.14)  | 0.020 (0.02 to 0.03) |
| σ <sup>2</sup> <sub>BLipid</sub> <sup>B</sup> | 0.83 (0.5 to 1)      | 0.56 (0.3 to 0.8)   | 0.95 (0.6 to 1.3)    | 0.96 (0.6 to 1.4)    | 1.3 (0.8 to 1.8)     | 1.3 (0.8 to 1.8)     |
| ICC <sub>FULL</sub> <sup>C</sup>              | 0.97                 | 0.89                | 0.97                 | 0.91                 | 0.93                 | 0.98                 |
| σ <sup>2</sup> <sub>WFull</sub> <sup>C</sup>  | 0.025 (0.02 to 0.03) | 0.069 (0.05 to 0.1) | 0.029 (0.02 to 0.04) | 0.098 (0.07 to 0.14) | 0.097 (0.07 to 0.13) | 0.02 (0.02 to 0.03)  |
| σ <sup>2</sup> <sub>BFull</sub> <sup>C</sup>  | 0.85 (0.5 to 1)      | 0.53 (0.3 to 0.8)   | 0.94 (0.6 to 1.3)    | 0.97 (0.6 to 1.4)    | 1.3 (0.8 to 1.9)     | 1.2 (0.7 to 1.7)     |

<sup>A</sup> Equation (1)  $Y_{ij} = \beta_0 + b_i + \epsilon_{ij}$

<sup>B</sup> Equation (2)  $Y_{ij} = \beta_0 + \beta_1 LIPID + b_i + \epsilon_{ij}$

<sup>C</sup> Equation (4)  $Y_{ij} = \beta_0 + \beta_1 TIME2 + \beta_2 TIME3 + \beta_3 AGE_i + \beta_4 SEX_i + \beta_5 BMI_i + \beta_6 LIPID_{ij} + b_i + \epsilon_{ij}$

Supplemental Table 3. Estimated kappa statistics and 95% confidence intervals assessing agreement between Round 1 and Round 2 categorization. (participants=52, serum samples=142).

| Parameters                     | $\Sigma$ PBDE       | BDE - 28            | BDE - 47            | BDE - 99            | BDE - 100         | BDE - 153          |
|--------------------------------|---------------------|---------------------|---------------------|---------------------|-------------------|--------------------|
|                                | Estimate (95% CI)   | Estimate (95% CI)   | Estimate (95% CI)   | Estimate (95% CI)   | Estimate (95% CI) | Estimate (95% CI)  |
| <i>Median Classification</i>   |                     |                     |                     |                     |                   |                    |
| $\kappa$                       | 0.90 (0.77 to 1)    | 0.85 (0.69 to 1)    | 0.80 (0.61 to 0.99) | 1 (1 to 1)          | 0.90 (0.77 to 1)  | 0.90 (0.77 to 1.0) |
| <i>Tertile Classification</i>  |                     |                     |                     |                     |                   |                    |
| $\kappa_{\text{weighted}}$     | 0.77 (0.63 to 0.92) | 0.70 (0.51 to 0.89) | 0.72 (0.56 to 0.88) | 0.69 (0.52 to 0.86) | 0.94 (0.87 to 1)  | 0.94 (0.87 to 1)   |
| <i>Quartile Classification</i> |                     |                     |                     |                     |                   |                    |
| $\kappa_{\text{weighted}}$     | 0.88 (0.79 to 0.97) | 0.82 (0.70 to 0.94) | 0.88 (0.78 to 0.97) | 0.84 (0.74 to 0.94) | 0.96 (0.91 to 1)  | 0.96 (0.91 to 1)   |

Supplemental Figure 1. Serum concentrations of BDE-47 (ng/g lipid) from repeated samples collected from 52 adult men and women over approximately a one year period.

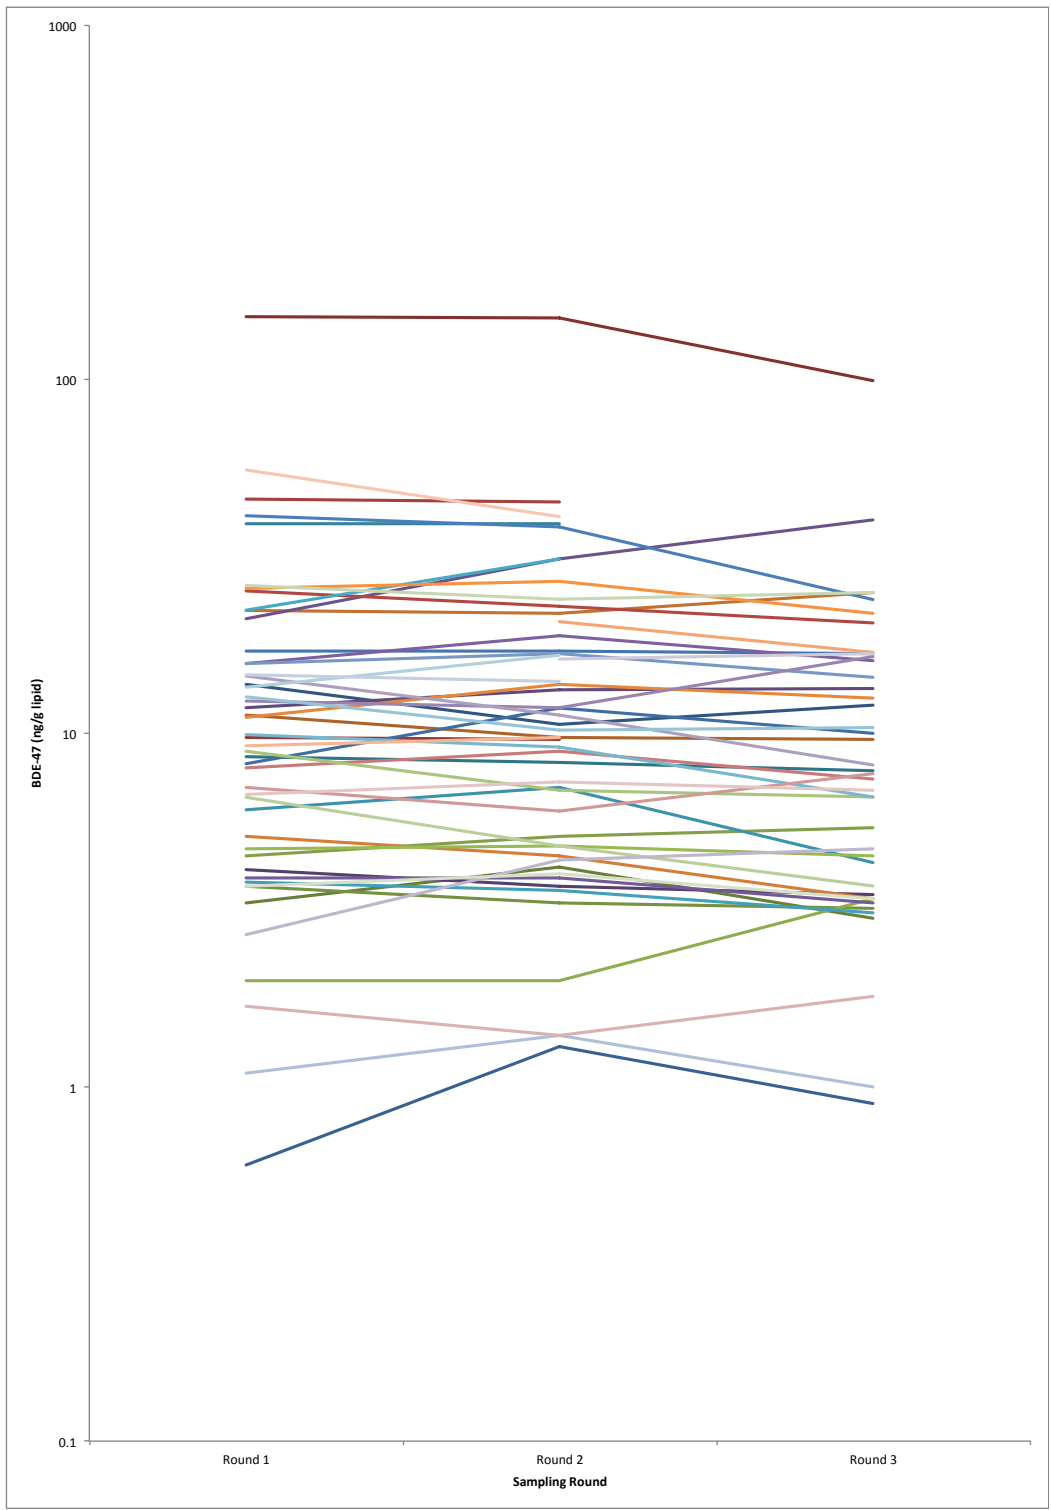

Supplemental Figure 2. Correlation of BDE-47 (ng/g lipid) in serum for individuals in round 1 and round 3.

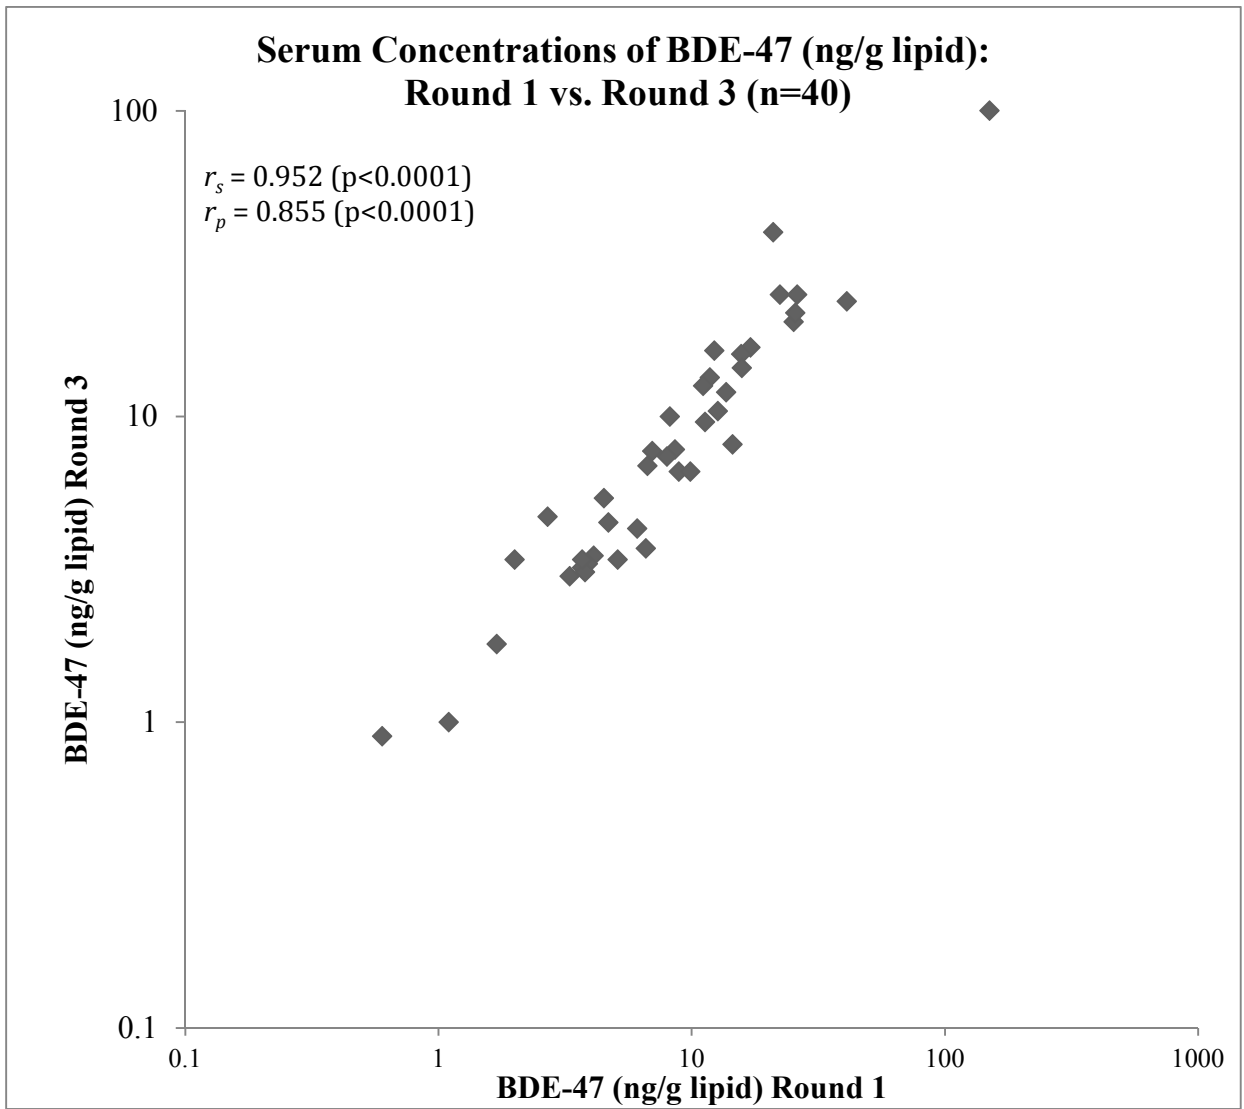

$r_s$  = spearman correlation coefficient  
 $r_p$  = pearson correlation coefficient

Supplemental Figure 3. Contingency tables of BDE-47 by type of exposure classification (participants=40).

Median

|         | Round 3 |      | Total |
|---------|---------|------|-------|
| Round 1 | Low     | High |       |
| Low     | 18      | 2    | 20    |
| High    | 2       | 18   | 20    |
| Total   | 20      | 20   | 40    |

Tertiles

|         | Round 3 |        |      | Total |
|---------|---------|--------|------|-------|
| Round 1 | Low     | Medium | High |       |
| Low     | 10      | 3      | 0    | 13    |
| Medium  | 3       | 8      | 3    | 14    |
| High    | 0       | 3      | 10   | 13    |
| Total   | 13      | 14     | 13   | 40    |

Quartiles

|           | Round 3 |        |      |           | Total |
|-----------|---------|--------|------|-----------|-------|
| Round 1   | Low     | Medium | High | Very High |       |
| Low       | 9       | 1      | 0    | 0         | 10    |
| Medium    | 1       | 7      | 2    | 0         | 10    |
| High      | 0       | 2      | 7    | 1         | 10    |
| Very High | 0       | 0      | 1    | 9         | 10    |
| Total     | 10      | 10     | 10   | 10        | 40    |
